# Supplementary material for: The crosstalk role of CDKN2A between tumor progression and cuproptosis resistance in colorectal cancer
Source: publisher site journal article supplement (doi:10.18632/aging.205945), 2024-06-17
Supplement: Supplementary file [file aging-v16-205945-supplementary-material-SD2.pdf]

## SUPPLEMENTARY TABLES

**Supplementary Table 1. Primers used for quantitative RT - PCR analysis.**

| <b>Genes</b> |         | <b>Primer sequences (5' - 3')</b> |
|--------------|---------|-----------------------------------|
| SNHG7        | Forward | AACCTGTGAGGATCGGTCAG              |
| SNHG7        | Reverse | GTCACCTCCTTCCCGTGTTA              |
| CDKN2A       | Forward | GATCCAGGTGGGTAGAAGGTC             |
| CDKN2A       | Reverse | CCCCTGCAAACCTTCGTCCT              |
| WNT2B        | Forward | CCTGTAGCCAGGGTGAAGTCTG            |
| WNT2B        | Reverse | CGGGCATCCTTAAGCCTCTT              |
| WNT3         | Forward | ATGAACCGCCACAACAACGAGG            |
| WNT3         | Reverse | GTCCTTGAGGAAGTCACCGATG            |
| WNT4         | Forward | GGAAGTGTCCCACTCGACTC              |
| WNT4         | Reverse | CGCACATCCACAAACGACTGT             |
| WNT5B        | Forward | AAGGAGTTTGTGGATGCC                |
| WNT5B        | Reverse | GCTACGTCTGCCATCTTATACAC           |
| WNT9B        | Forward | AGTGCCAGTTTCAGTTCCG               |
| WNT9B        | Reverse | GGAAAGCTGTCTCTTTGAAGC             |
| WNT10        | Forward | CCCAATGACATTCTGGACCT              |
| WNT10        | Reverse | TAAGCGGTGCAGCTTCCTAC              |
| DLAT         | Forward | GCAGGACTCATCACACCTATTGT           |
| DLAT         | Reverse | GTAGTTTACCTCTCTTGCTTTGG           |
| LIAS         | Forward | GTATGTGAGGAAGCTCGATGTC            |
| LIAS         | Reverse | CACCCATCAACATGATCGTGG             |
| SLC31A2      | Forward | ATCAGCCAGCAGACCATCGCAG            |
| SLC31A2      | Reverse | TGAAGTAGCCGATGACCACCTG            |
| SLC31A1      | Forward | GGGGATGAGCTATATGGACTCC            |
| SLC31A1      | Reverse | TCACCAAACCGGAAAACAGTAG            |
| FDX1         | Forward | TTCAACCTGTCACCTCATCTTTG           |
| FDX1         | Reverse | TGCCAGATCGAGCATGTCATT             |
| PFKL         | Forward | AAGAAGTAGGCTGGCACGACGT            |
| PFKL         | Reverse | GCGGATGTTCTCCACAATGGAC            |
| PFKM         | Forward | AGCGTTTCGATGATGCTTCAG             |
| PFKM         | Reverse | GGAGTCGTCCTTCTCGTTCC              |
| ATP7B        | Forward | ATATTGAGCGGTTACAAAGCACT           |
| ATP7B        | Reverse | TGCCCCAAGGTCTCAGAATTA             |
| GAPDH        | Forward | CTTCTCCTTCAGGGCATCA               |
| GAPDH        | Reverse | CTTCTCCTTCAGGGCATCA               |

**Supplementary Table 2. Transient transfection of gene sequences.**

| <b>Name</b>            |           | <b>Primer sequences (5' - 3')</b> |
|------------------------|-----------|-----------------------------------|
| U6                     | sense     | CTCGCTTCGGCAGCACA                 |
|                        | sense     | AACGCTTCACGAATTTGCGT              |
| SNHG7-siRNA            | sense     | GGCCUGACUACUUGCAATT               |
|                        | antisense | UUGCAAGAAUGUCAGGCCTT              |
| CDKN2A-siRNA           | sense     | GCCACGCACCGAAUAGUTT               |
|                        | antisense | ACUAUUCGGUGCGUUGGGCTT             |
| Has-miR-133b mimic     | sense     | UUUGGUCCCCUUCAACCAGCUA            |
|                        | antisense | GCUGGUUGAAGGGGCAAUUU              |
| Hsa-miR-133b inhibitor | sense     | UAGCUGGUUGAAGGGGACCAAA            |
|                        | nc        | CAGUACUUUUGUGUAGUACAA             |
